# Supplementary material
Source: publisher figshare collection journal article supplement (https://asha.figshare.com/articles/dataset/_/25412458)
Supplement: Supplementary file 1 [file 1]

## Sheet: Supplementary Table JSLHR
Supplemental material, Dutta et al., “Universal and Language-Specific Connected Speech Characteristics of Bilingual Speakers With Alzheimer’s Disease: Insights From Case Studies of Structurally Distinct Languages,” JSLHR, https://doi.org/10.1044/2024_JSLHR-23-00254
Supplemental Material S3. A complete list and definitions of variables derived from the Quantitative Production Analysis (QPA) and Correct Information Unit (CIU) analyses.
				Bengali Frog Story					English Frog Story
						HC Group					HC Group
	Variable Name	Variable Relevant for Bengali (B), English (E)	Variable Definition	AD03	AD09	Mean	SD		AD03	AD09	Mean	SD
	Speech rate
	Duration of the narrative, sec (s)	B, E	The amount of time in the sample including speech and pauses. Excluded from the duration were all periods during which the examiner is speaking (Berndt et al., 2000)	509	764	201.125	50.9		609	922	199.71	61.14
	Total number of words	B, E	Total number of words produced by the participants. Indistinct strings of phonemes and discourse markers such as um, aah, uh were excluded from the word count (Saajjadi et al., 2012).	406	537	466	211.976		447	706	359.14	125.12
P	Words per minute	B, E	Measure of speech rate. The total number of words uttered by participants (i.e., including repetitions, corrections, restarts, and paraphasias as well as patients’ direct responses to the questions and excluding indistinct strings of phonemes and discourse markers [um, aah, uh] and examiner's speech) divided by the time taken to narrate the story (i.e., the time from the end of the tester’s instr…	48.21	42.17	135.923	31.8929		44.04	45.94	107.75	10.74
	Structural and syntactic measures
	Number of sentences	B, E	Total number of sentences (ill-formed or well-formed) in the narrative sample.	32	38	19.625	2.82527		26	23	17	5.2
	Number of topic/comment utterances	B, E	Total number of topic or comment utterances in the narrative sample.	9	11	2.625	2.26385		0	1	0.14	0.38
	Number of embeddings	B, E	Total number of embeddings in the narrative sample.	0	0	9.375	2.55999		1	2	3	2
	Number of well-formed sentences	B, E	Total number of well-formed sentences in the narrative sample.	28	33	18.125	3.13676		12	18	15	5.03
	Number of words in sentences	B, E	Total sum of words in sentences.	138	127	147.5	12.2007		150	154	143.14	10.32
	Number of words in topic or comments	B, E	Total sum of words in topic or comments utterances.	29	32	10.375	10.5009		0	3	0.57	1.51
	Proportion of words in sentences	B, E	Total number of words in utterances that were sentences divided total number of sentences.	0.826347	0.798742	0.933481	0.0661122		0.96	0.98	0.95	0.06
P	Mean sentence length	B, E	The average number of words produced per sentence.	4.3125	3.34211	7.58981	0.734593		5.77	6.7	8.95	2.16
P	Proportion of well-formed sentences	B, E	Total number of well-formed sentences divided by the total number of sentences.	0.875	0.868421	0.922457	0.0730563		0.46	0.78	0.89	0.12
P	Embedding index	B, E	Total number of embeddings divided by the total number of sentences. This measure provides a quantification for utterance complexity. Fewer embedding would imply less complex utterances.	0	0	0.497644	0.181055		0.04	0.09	0.21	0.14
	Lexical measures
	Number of narrative words (NW)	B, E	The number of narrative words were obtained from the transcribed sample after removing habitual starters, stereotype story phrases, examiner’s prompts, discourse markers, nonwords, coordinating conjunctions, participants' direct responeses to specific questions, comments made by the participant, repetition, and repairs (Berndt et al., 2000). The first 150±10 narrative words were used for the QPA …	167	159	158	6		157	157	151	3.79
	Number of open class words	B, E	Total sum of all open class words, that is, nouns, verbs, adjectives, and adverbs.	131	136	120	6.98979		74	61	70.57	4.39
	Number of closed class words	B, E	Total sum of all closed class words, that is, pronouns, postpositions, and indecinables.	36	23	38	7.15142		83	96	80.43	5.91
P	Proportion of open class words	B, E	Total number of open class words divided by total number of narrative words.	0.784431	0.855346	0.759859	0.0421801		0.47	0.39	0.47	0.03
P	Proportion of closed class words	B, E	Total number of closed class words divided by total number of narrative words.	0.215569	0.144654	0.240141	0.0421801		0.53	0.61	0.53	0.03
	Number of nouns (N)	B, E	Total sum of all nouns.	52	51	52.75	4.62138		36	30	34	4.76
	Number of verbs (V)	B, E	Total sum of all verbs.	41	45	37.375	6.13974		37	29	26.57	3.51
	Number of nonfinite verbs (NF)	B, E	Total sum of all nonfinite verbs.	9	4	14.25	3.37004
	Number of auxiliary (Aux)	E	Total sum of all auxiliary elements of the matrix verb	NR	NR				58	58	38.14	10.14
	Number of compound verbs (CV)	B	Total sum of all compound verbs.	9	15	12.25	4.13176
	Number of adjectives (Adj)	B, E	Total sum of all adjectives.	30	19	14.25	2.91548		2	1	8.29	4.35
	Number of adverbs (Adv)	B, E	Total sum of all adverbs	5	7	4.5	3.25137		0	0	0.71	0.95
	Number of all pronouns	B, E	Total sum of all pronouns.	11	7	19.25	5.25765		15	24	21.7143	4.82059
	Number of demonstrative pronouns	B, E	Total sum of all demonstrative pronouns.	7	1	2.875	1.72689		8	2	1	1.52753
	Number of personal pronouns (P)	B, E	Total sum of all personal pronouns.	4	6	16.375	4.65794		7	12
	Number of postpositions (Po)	B	Total sum of all postpositions.	10	19	12.125	3.90741		NR	NR	NR	NR
	Number of preposition (Pr)	E	Total sum of all prepositions.	NR	NR				15	17	16.57	3.74
P	Number of reduplication	B	Total sum of all reduplications.	0	0	3	2.77746		NR	NR	NR	NR
	Proportional measures from lexical counts
P	Proportion of noun (N/all NW)	B, E	Total number of nouns divided by total number of narrative words.	0.311377	0.320755	0.334267	0.0323484		0.229299	0.191083	0.224828	0.0280631
	Proportion of noun (N/N+V)	B, E	Total number of nouns as proportion of total number of nouns and verbs.	0.55914	0.53125	0.586845	0.0361901		0.493151	0.508475	0.56027	0.055419
	Noun – verb ratio: #N/#V	B, E	Total number of nouns divided by total number of verbs.	1.26829	1.13333	1.43658	0.211867		0.972973	1.03448	1.30438	0.281074
	Proportion of noun (N/N+Pr)	B, E	Total number of nouns as proportion of total number of nouns and pronoun.	0.928571	0.894737	0.763851	0.0612625		0.837209	0.576923	0.622996	0.0609112
P	Proportion of pronoun (P/all NW)	B, E	Total number of personal pronouns divided by total number of narrative words.	0.0239521	0.0377358	0.10351	0.028598		0.0955414	0.152866	0.143753	0.0319045
P	Proportion of pronoun to noun (P/P+N)	B, E	Total number of personal pronouns as proportion of total number of pronoun and nouns.	0.0714286	0.105263	0.236149	0.0612625		0.294118	0.444444	0.388231	0.0617642
P	Proportion of verb (V/all NW)	B, E	Total number of verbs divided by total number of narrative words.	0.245509	0.283019	0.236703	0.0385269		0.235669	0.184713	0.176323	0.0261865
	Proportion of verb (V/V+N)	B, E	Total number of verbs as proportion of total number of verbs and nouns.	0.44086	0.46875	0.413155	0.0361901		0.506849	0.491525	0.43973	0.055419
P	Porportion of matrix verb (MV/all V)	B, E	Total number of martix as proportion of total number of verbs.	0.780488	0.911111	0.619133	0.074636		0.756757	0.896552	0.71	0.12
	Proportion of adjective (Adj/all NW)	B, E	Total number of adjective divided by total number of narrative words.	0.179641	0.119497	0.0898779	0.0165598		0.0127389	0.00636943	0.0551006	0.0293358
	Proportion of adverb (Adv/all NW)	B, E	Total number of adverb divided by total number of narrative words.	0.0299401	0.0440252	0.0286344	0.0211052		0	0	0.00473135	0.00633149
P	Proportion of postposition (Po/all NW)	B	Total number of postposition divided by total number of narrative words.	0.0598802	0.119497	0.0766767	0.0242964		NR	NR	NR	NR
P	Proportion of preposition (Pr/all NW)	E	Total number of preposition divided by total number of narrative words.	NR	NR	NR	NR		0.0955414	0.10828	0.10948	0.0226256
	Morphological and inflectional measures
	Nouns inflections
	Total number of nouns	B, E	Total sum of all nouns.	52	51	52.75	4.62138		36	30	34	4.76
	Number of nouns in base form	B	Total sum of nouns in bare (i.e., uninflected) form.	29	25	22.375	6.67485		NR	NR	NR	NR
	Number of nouns possible to be inflected	B	Total sum of nouns that are possible for inflections.	23	26	30.375	4.47014		NR	NR	NR	NR
	Appropriate noun inflection	B	Total sum of nouns that are appropriately inflected.	23	24	30.375	4.47014		NR	NR	NR	NR
P	Noun inflection index	B	Total number of appropriately inflected nouns to the number of nouns that are possible to be inflected. This could be conceptually similar to noun determiner index of the QPA in English.	1	0.923077	1	0		NR	NR	NR	NR
	Number of nouns requiring a determiner (NRDs)	E	Total sum of all nouns requiring a determiner.	NR	NR	NR	NR		34	28	28.71	6.7
	Number of NRDs with a determiner	E	Total sum of all nouns that require a determiner that occurs with a determiner	NR	NR	NR	NR		28	27	28.14	6.62
P	Determiner index (determiner/noun)	E	Proportion of determiners produced in obligatory contexts.	NR	NR	NR	NR		0.82	0.96	0.98	0.03
	Noun inflection type
	Total number of inflected nouns	B	Total sum of inflected nouns.	23	24	30.375	4.47014
	N with 1 inflection	B	Total sum of nouns with 1 inflection.	18	22	25.5	3.0706
	N with 2 inflections	B	Total sum of nouns with 2 inflections.	5	2	5.57143	2.93582
	N with >2 inflections	B	Total sum of nouns with >2 inflections.
	Proportion of inflected nouns	B	Total number of inflected nouns to the total number of nouns produced in the narrative sample.	44.2308	47.0588	58.0493	10.7214
	Proportion of noun with 1 inflection	B	Total number of inflected nouns with one inflection to the total number of all inflected nouns.	0.782609	0.916667	0.846257	0.0907942
	Proportion of noun with 2 or > inflections	B	Total number of inflected nouns with two or more inflections to the total number of all inflected nouns.	0.217391	0.0833333	0.175706	0.071521		NR	NR	NR	NR
	Verb inflections
	Number of verbs	B, E	Totat sum of all verbs.	41	45	37.375	6.13974		37	29	26.57	3.51
	Number of inflectable verbs	B, E	Total number of inflectable verbs.	41	45	37.375	6.13974		18	8	10.29	2.69
	Number of inflectable verbs inflected	B, E	Total number of inflectable verbs that are inflected.	41	45	37.375	6.13974		16	8	9.71	2.75
P	Verb inflection index	B, E	Total number of appropriately inflected vebs to the number of verbs that are possible to be inflected. This is conceptually similar to the verb inflection index of the QPA in English.	1	1	1	0		0.89	1	0.94	0.07
P	Auxiliary Index (Aux/MV-1)	E	It is an index of elaboration of the auxiliary in matrix verbs and derived by taking the ratio of total auxiliary score to total number of matrix verb minus 1.						1.07	1.23	1	0.12
	Semantic measures
	Word count	B, E	To be included in the word count, words had to be accurate, relevant, and informative relative to the eliciting stimuli, and did not have to be used in a grammatically accurate manner (Nicholas & Brookshire, 1993). This word count were derived using the length of the sample that were used for QPA analysis. For the Frog Story, length of the sample is up to until the first 150±10 narrative words is…	241	289	178.5	13.0384		252	263	166.86	7.29
	Duration of the narrative for the CIU analysis (sec)	B, E	Duration of the narrative used for the CIU calculations. For the Frog Story, it is the duration of the sample until the first 150±10 narrative words is acquired. For the Picnic picture description, the duration of the sample is used.	193	254	100.63	14.38		312	337	92.57	10.49
P	Number of CIU	B, E	The total number of intelligible, accurate and informative words that were relevant to the Frog story (Nicholas & Brookshire, 1993)	154	143	161.625	5.70557		151	136	149.43	3.74
P	CIU% (Idea density)	B, E	Total number of CIUs (i.e., semantic units) divided by the total number of words used in the sample.	63.9004	49.481	90.8669	5.54321		59.92	51.71	89.72	4.86
P	CIUs per minute (Idea efficiency)	B, E	Total number of CIUs (i.e., semantic units) divided by the duration of the sample used for calculation of the CIUs.	47.87	33.78	98.2375	15.927		29.04	24.21	97.91	11.16
	Measures of spontaneity and fluency disruptions
	Repetition	B, E	Total number words or whole phrases repetition. For example, whole word (e.g., the <boy> boy was searching for his frog) or phrase-level repetitions (e.g., <The boy>... The boy was searching for his frog). Reduplication of words which is natural phenomenon in Bengali was not considered as repetition (e.g., ashte ashte, i.e., slowly slowly).	6	4	0.75	1.0351		4	22	0.571429	0.786796
	Revisions	B, E	These include when the speaker changes something (usually the syntax) of an utterance but maintains the same idea. It could be word (e.g., a <frog>..dog) or phrase (e.g., <The boy is> …They boy was very upset to not find his frog) revisions.	6	17	2.25	2.54951		5	11	1.28571	1.49603
	Reformulations	B, E	These included full and complete reformulations of the message without any specific corrections. For example: “<They boy was searching>...uh he decided to return to the pond".	0	0	0.125	0.353553		2	2	0.714286	1.25357
P	Total count of disruption of spontaenity and fluency	B, E	Sum of count of repetitions, revisions and reformulations.	12	21	3.125	2.90012		11	35	2.71429	2.42997
