# Supplementary material
Source: publisher figshare collection journal article supplement (https://asha.figshare.com/articles/dataset/_/25412458)
Supplement: Supplementary file 1 [file 1]

**Supplemental Material S1.** Existing studies exploring language in bilingual AD (based on Stilwell et al., 2016, and Calabria et al., 2017).

| Study                           | Total number of participants | Language combination      | Bilingualism profile                      | Language task                               | Which language was more affected? |             |      |                                       |
|---------------------------------|------------------------------|---------------------------|-------------------------------------------|---------------------------------------------|-----------------------------------|-------------|------|---------------------------------------|
|                                 |                              |                           |                                           |                                             | Dominant                          | Nondominant | Both | Other                                 |
| Hyltenstam & Obler (1989)       | 2                            | 1 German-Swedish          | Highly proficient                         | Interview (to study code switching)         |                                   |             |      | L2 more affected (intrusions from L1) |
|                                 |                              | 1 Swedish-Finnish         |                                           |                                             |                                   |             |      |                                       |
| Hyltenstam & Stroud (1993)      | 6                            | Finnish (L1)-Swedish (L2) | Late bilinguals                           | Interview (to study code switching)         |                                   |             |      | L2 more affected (intrusions from L1) |
| Friedland & Miller (1999)       | 4                            | English-Afrikaans         | Late bilinguals                           | Conversation                                |                                   | ✓           |      |                                       |
| De Picciotto & Friedland (2001) | 6                            | English-Afrikaans         | Highly proficient                         | Semantic fluency                            |                                   | ✓           |      |                                       |
| Meguro et al. (2003)            | 4                            | Japanese-Portuguese       | Reported to communicate in both languages | Naming                                      |                                   | ✓           |      |                                       |
|                                 |                              |                           |                                           | Oral reading                                |                                   |             |      |                                       |
|                                 |                              |                           |                                           | Vocabulary comprehension                    |                                   |             |      |                                       |
|                                 |                              |                           |                                           | Lexical Decision                            |                                   |             |      |                                       |
| Hernandez et al. (2007)         | 1                            | Catalan (L1)-Spanish (L2) | Early                                     | Naming                                      |                                   |             | ✓    |                                       |
|                                 |                              |                           | Highly proficient                         | Word-picture matching                       |                                   |             |      |                                       |
|                                 |                              |                           |                                           | Sentence completion                         |                                   |             |      |                                       |
| Salvatierra et al. (2007)       | 11                           | Spanish (L1)-English (L2) | Nonbalanced;<br>L1-dominant               | Phonemic and Semantic Fluency               |                                   |             | ✓    |                                       |
| Gollan et al. (2010)            | 29                           | Spanish-English           | Non-balanced                              | Naming                                      | ✓                                 |             |      |                                       |
| Gomez-Ruiz et al. (2011)        | 12                           | Catalan (L1)-Spanish (L2) | Early bilinguals                          | Bilingual Aphasia Test (BAT; Paradis, 2011) |                                   |             | ✓    |                                       |

|                           |                     |                                |                                 |                                                                                                                       |                           |                       |                       |  |
|---------------------------|---------------------|--------------------------------|---------------------------------|-----------------------------------------------------------------------------------------------------------------------|---------------------------|-----------------------|-----------------------|--|
| Costa et al.<br>(2012)    | Probable<br>AD = 47 | Catalan (L1)-<br>Spanish (L2)  | Early bilinguals;               | Naming                                                                                                                |                           |                       | ✓                     |  |
|                           | MCI = 24            |                                | Highly-proficient               | Word-picture<br>matching                                                                                              |                           |                       |                       |  |
|                           |                     |                                |                                 | Word<br>Translation                                                                                                   |                           |                       |                       |  |
| Ivanova et al.<br>(2014)  | 12                  | Spanish-English                | Non-balanced                    | Naming                                                                                                                | ✓ (Cross-<br>sectionally) | ✓<br>(Longitudinally) |                       |  |
| Manchon et al.<br>(2014)  | 13                  | 8 German (L1)-<br>French (L2)  | Late, proficient-<br>bilinguals | Oral<br>comprehension                                                                                                 |                           |                       | ✓                     |  |
|                           |                     | 3 Spanish (L1)-<br>French (L2) |                                 | Naming                                                                                                                |                           |                       |                       |  |
|                           |                     | 2 Italian (L1)-<br>French (L2) |                                 | Repetition                                                                                                            |                           |                       |                       |  |
|                           |                     |                                |                                 | Verbal fluency                                                                                                        |                           |                       |                       |  |
| Calabria et al.<br>(2017) | AD = 35;            | Catalan (L1)-<br>Spanish (L2)  | Early bilinguals;               | Picture naming                                                                                                        |                           |                       | ✓<br>(Longitudinally) |  |
|                           | MCI = 15            |                                | Highly-proficient               | Word<br>translation                                                                                                   |                           |                       |                       |  |
|                           |                     |                                |                                 | Word<br>comprehension                                                                                                 |                           |                       |                       |  |
| Nanchen et al.<br>(2017)  | 20                  | 14 German (L1)-<br>French (L2) | Late, proficient-<br>bilinguals | Oral<br>comprehension                                                                                                 |                           |                       | ✓                     |  |
|                           |                     | 2 Spanish (L1)-<br>French (L2) |                                 | Production from<br>BAT and<br>adapted Boston<br>Diagnostic<br>Aphasia<br>Examination<br>(Goodglass &<br>Kaplan, 1972) |                           |                       |                       |  |
|                           |                     | 4 Italian (L1)-<br>French (L2) |                                 |                                                                                                                       |                           |                       |                       |  |

Note. AD = Alzheimer's disease; MCI = mild cognitive impairment.
